# 1     **The effect of the preceding masking noise on monaural** 2     **and binaural release from masking**

3     Hyojin Kim<sup>1\*</sup>, Bastian Epp<sup>1</sup>

4     <sup>1</sup>Hearing Systems Section, Department of Health Technology, Technical University of Denmark,  
5     Kgs. Lyngby, Denmark

6     \*hykim@dtu.dk

7

## 8     **ABSTRACT**

9     The auditory system uses various signal properties to separate a target signal from background noise. When  
10    a target tone is preceded by a noise, the threshold for target detection can be increased or decreased  
11    depending on the type of a preceding masker. The effect of the preceding masker on the following sound can  
12    be interpreted as stream formation. The effect of stream formation is assumed to be either the result of  
13    adaptation at a low-level or high-level auditory processing. In an attempt to disentangle these, we investigated  
14    the time constant of the underlying process of adaptation by varying the length of the preceding masker. We  
15    designed stimuli consisting of the preceding masker and the following masked tone. Each stimulus induces  
16    various stream formation, affecting following target detection or masking release. Target tone was presented  
17    in comodulated masking noise and with interaural phase difference (IPD), inducing comodulation masking  
18    release (CMR) and binaural masking level difference (BMLD), respectively. We measured CMR and BMLD  
19    when the length of preceding maskers varied from 0 (no preceding masker) to 500 ms. We postulate that if  
20    the adaptation is dominated by high-level auditory processing, both CMR and BMLD will be affected by an  
21    increase in the length of the preceding masker. Results showed that CMR was more affected with longer  
22    preceding maskers from 100 ms to 500 ms compared to shorter maskers. On the contrary, the preceding  
23    masker did not affect the BMLD. Based on the results, we suggest that the adaptation to a preceding masking  
24    sound may arise from a low-level (e.g., cochlear nucleus, CN) rather than the temporal integration by the  
25    high-level auditory processing.

## 26 1. Introduction

27 The ability to listen to a particular talker while other people speak simultaneously is one of the most  
28 outstanding abilities of the auditory system of humans. The detrimental impact of a hearing loss on this ability  
29 is often referred to as the "cocktail party problem" [Cherry, 1953]. One approach to explain this ability is  
30 known as "auditory scene analysis," suggesting that our auditory system perceives the acoustic environment  
31 as a combination of multiple auditory streams [Bregman, 1994]. Creating auditory streams enables us to  
32 segregate a target sound from the remaining sound, which is grouped into a masker. For stream formation,  
33 the auditory system makes use of signal properties or auditory cues extracted from the sounds reaching the  
34 two ears. This is analogous to the visual system that uses visual cues such as colors, textures, shapes to  
35 separate target object from other visual objects [Bregman, 1994]. Hence, a stream can be thought of as a  
36 basic unit of sound perception resulting from a perceptual grouping of auditory cues.

37 Perceptually, frequency components aligned closely in frequency or in time are more likely to be  
38 grouped into one stream than distant components [Bregman, 1994]. In a context-dependent case, one of the  
39 key principles of stream formation is that sound elements that come from the same sound source are likely to  
40 be grouped into the same stream [Moore and Gockel, 2012]. In addition, the information of sound elements  
41 can be accumulated in time, affecting following sound perception [Bregman, 1978, Anstis and Saida, 1985].  
42 The temporal effect on the stream formation is referred to in various terms such as "build-up of stream  
43 segregation" and "adaptation to auditory streaming" [Moore and Gockel, 2012, Anstis and Saida, 1985].

44 As our vocal tract vibrates, it modulates all emitted frequency components due to its vibration  
45 [Raphael et al., 2007]. Such comodulation is a common property of natural sounds, suggesting that  
46 comodulation plays a role as a "grouping cue" for our auditory system [Nelken et al., 1999]. Experimentally,  
47 the benefit of comodulation has been shown by using a detection task [Hall et al., 1984, 1990]. The masked  
48 threshold of a tone decreases when the noise shows coherent intensity fluctuations across frequency  
49 compared to the condition where the tone is masked by a noise masker with uncorrelated intensity  
50 fluctuations across frequency. This enhancement in the detection performance can be quantified as a  
51 decrease in masked thresholds, often referred to as comodulation masking release (CMR) [Hall et al., 1984].  
52 Based on the concept of stream formation, it can be assumed that comodulation supports the grouping of  
53 frequency components of the masker into one stream, thereby facilitating the segregation of the tone from the  
54 masker. Secondly, similar to comodulation, spatial information can induce a spatial masking release. When  
55 sounds reach the ears from a specific location in space, it induces differences in phase and level between the  
56 ears, which also can be beneficial for target detection [van de Par and Kohlrausch, 1999]. The decrease in  
57 masked thresholds induced by interaural disparities can be quantified as binaural masking level difference  
58 (BMLD) [Jeffress et al., 1956, van de Par and Kohlrausch, 1999]. In the study by Epp and Verhey [2009], they  
59 showed the superposition of CMR and BMLD where the overall masking release was close to the sum of  
60 CMR and BMLD. To shed light on a possible underlying mechanism, they implemented a conceptual model  
61 based on the assumption of serially-aligned processing of CMR and BMLD. However, the exact order of CMR  
62 processing and IPD processing could not be separated with their modeling approach.

63 Studies in both psychoacoustics and physiology have suggested that CMR can be interpreted as the  
64 combined effect of "primitive segregation" and "schema-driven segregation" [Bregman, 1994]. Primitive  
65 segregation can be understood as the auditory object arising by innate and direct processing of incoming  
66 acoustic input. Schema-driven processing can be understood that the auditory system uses stored  
67 knowledge of sound input on long time scales to form the auditory object [Moore and Gockel, 2012]. In  
68 physiological studies, neural correlates of CMR have been found at various stages along the auditory  
69 pathway. The earliest neuronal encoding was found in the cochlear nucleus (CN) as an increased neuronal  
70 response to a tone in comodulated noise compared to ones presented in uncorrelated noise [Pressnitzer  
71 et al., 2001, Neuert et al., 2004]. This enhanced neuronal response progressively sharpens along the  
72 auditory pathway passing the inferior colliculus (IC), medial geniculate body (MGB), and auditory cortex  
73 [Nelken et al., 1999, Las et al., 2005]. This suggests that CMR is induced by bottom-up processing (primitive  
74 segregation). Other studies propose, however, that CMR is the effect of high-order auditory processing  
75 (schema-driven segregation). When a tone in a comodulated masker is preceded and followed by another  
76 masker (temporal fringe), CMR decreases or increases depending on the type of temporal fringe maskers  
77 [Grose et al., 2009]. This implies that CMR can be affected by the stream formed before and after the target is  
78 presented. Dau et al. [2005] found that both pre-cursors and post-cursors could eliminate CMR. In their later  
79 study, they suggested that for the effect of pre-cursors, it is hard to exclude the effect of peripheral neural  
80 adaptation. Furthermore, the neural correlates of the influence of preceding maskers on CMR (e.g.,  
81 reduced/increased CMR depending on temporal contexts) have also been found in A1 [Sollini and

82 Chadderton, 2016]. This study showed that a preceding stream is formed as the auditory system adapts to  
83 the sound. Nevertheless, it is still unknown whether neural representation at A1 level is the relayed neural  
84 encoding from the CN and IC (bottom-up), or there is cortical feedback to the sub-cortical processing of CMR  
85 (top-down) or an additional CMR processing occurs at A1 (high-level auditory processing). In the case of  
86 BMLD induced by IPD, physiological evidence suggests that IPD information is processed at the IC, which is  
87 located after the CN [Shackleton et al., 2005, 2003, Zohar et al., 2011]. Contrary to CMR, little has been  
88 found regarding the stream formation effect on BMLD.

89 The neural basis of the effect of the preceding masker on CMR and BMLD is not clarified yet. In  
90 this study, we try to contribute to provide more insights on this problem. By varying the duration of preceding  
91 maskers to disentangle the adaptation effect on masking release at a low-level and at high-level auditory  
92 processing. The underlying assumption is that the time constants inherent in auditory processing increase  
93 along the ascending auditory pathway. We investigated the effect of adaptation on CMR, and whether the  
94 same adaptation effect can be found in BMLD. Our hypothesis was that if the adaptation is the result of higher-  
95 order processing at the system level, this will affect both CMR and BMLD. In the first experiment, we measured  
96 masked thresholds by varying the length of the preceding maskers to test the effect of the preceding masker  
97 on CMR. In the second experiment, we measured masked thresholds in the presence of the binaural cue  
98 (IPD of  $\pi$ ) in the same conditions as the first experiment. Results showed that only CMR was affected by  
99 the increased exposure time to preceding maskers while BMLD showed no adaptation effect, suggesting the  
100 low-level processing for the adaptation effect.

## 101 **2. Methods**

### 102 **2.1. Stimuli**

103 We measured CMR and BMLD with six different lengths of preceding maskers (0 ms, 20 ms, 100 ms, 200 ms,  
104 300 ms, and 500 ms; see Figure 1). Each masker consisted of five narrow noise bands with 20 Hz bandwidth.  
105 The center band (CB) was centered at 700 Hz and the remaining four masker bands (flanking bands, FBs)  
106 were centered at 460, 580, 820, and 940 Hz. The spectral distance between the masker bands was chosen  
107 to maximize CMR based on Grose et al. [2009]. The tone was centered at 700 Hz, along with the CB. For two  
108 conditions with no preceding masker, two types of maskers were used (0 ms): the masker with uncorrelated  
109 intensity fluctuations across frequency (R), and with coherent intensity fluctuations across frequency (C). To  
110 investigate the effect of preceding maskers, we used four different stimuli consist of a preceding masker (20 -  
111 500 ms) and following masked tone (200 ms): the reference condition with uncorrelated masker for both the  
112 preceding and following maskers (RR), and three maskers consisting of a comodulated masker preceded by  
113 three different maskers: uncorrelated masker (RC), comodulated masker (CC), and a masker with comodulated  
114 flanking-band (FC). The preceding masker was overlapped with the masker presented with the tone using a  
115 20 ms raised-cosine off- and onset ramp with 50% overlap. The overall level of the masker was set to 60 dB  
116 SPL. To induce BMLD, we presented the tone with an interaural phase difference (IPD) of  $\pi$ .

### 117 **2.2. Protocol**

118 After the training session, each listener performed three threshold measurements for all conditions. For each  
119 measurement, conditions were presented in randomized order. The thresholds were estimated by averaging  
120 three trials. An additional measurement was done if the thresholds from the last three measurements had  
121 high variance ( $SD > 3$  dB). During the threshold measurement, the listeners were seated in a double-walled,  
122 soundproof booth with ER-2 headphones. We used an adaptive, three-interval, three-alternative forced-choice  
123 procedure (3-AFC) with a one-up, two-down rule to estimate the 70.7% of the psychometric function [Ewert,  
124 2013], Levitt [1971]. Three sound intervals were presented with a pause of 500 ms in between. Two intervals  
125 contained only the maskers, while one interval contained the target tone with maskers. The listeners' task was  
126 to choose the interval with a target tone by pressing the corresponding number key (1, 2, 3) on the keyboard.  
127 Whenever the listener pressed the keyboard, visual feedback was provided, indicating whether the answer was  
128 "WRONG" or "CORRECT". The target tone's start level was set to 75 dB. Depending on the answer, the tone  
129 level was adjusted with an initial step size of 8 dB. The step size was halved after each lower reversal until  
130 it reached the minimum step size of 1 dB. The signal level at a minimum step size of 1dB was measured six  
131 times, and the mean of those measurements was used as the estimated threshold.

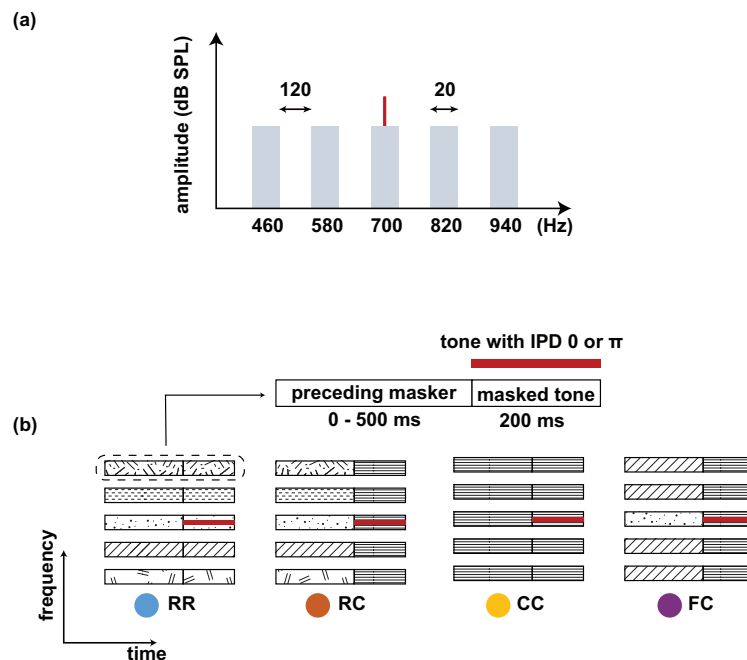

**Figure 1: (a) Spectra of the stimulus. A target tone (700 Hz) was presented with a masking noise consisting of five narrow-band maskers: One signal centered band (SCB) and four flanking bands (FBs). The bandwidth of each masker band was 20 Hz, and the frequency spacing was 120 Hz. The overall level of the noise was set to 60 dB SPL. (b) Schematic spectrograms of the stimulus conditions. Each stimulus consisted of a preceding masker (0 - 500 ms) and a masked tone (200 ms). Four types of maskers were used: RR, RC, CC, and FC. The RR was used as the reference condition with uncorrelated masker bands. In the other three conditions, the maskers consisted of a comodulated masker preceded by three different maskers: uncorrelated masker (RC), comodulated masker (CC), and the masker with comodulated flanking-bands (FC). The thick line represents a tone that was presented with an IPD of 0 or  $\pi$ .**

## 132 2.3. Listeners

133 We recruited eleven normal-hearing listeners after the initial hearing screening. None of them reported any  
 134 history of hearing impairment and had pure-tone hearing thresholds within 15 dB HL for the standard  
 135 audiometric frequencies from 125 to 4000 Hz. All participants provided informed consent, and all experiments  
 136 were approved by the Science-Ethics Committee for the Capital Region of Denmark (reference H-16036391).

## 137 3. Results

### 138 3.1. The threshold measurements

139 We measured masked thresholds in diotic and dichotic conditions. Figure 2(left panels, a-c) show the mean  
 140 thresholds across all listeners. Masked thresholds in diotic conditions are plotted with solid lines and masked  
 141 thresholds in dichotic conditions are plotted with dotted lines. Each plot shows the mean threshold values from  
 142 20 ms to 500 ms of preceding maskers for four masker types: RR, RC, CC, and FC. As a reference, we had two  
 143 masker types without preceding maskers (0 ms): R and C. Thresholds in the RR condition were almost constant  
 144 as the length of preceding masker increased. The introduction of an IPD reduced the masked threshold by  
 145 approximately 15 dB. With 20 ms duration of the preceding maskers, thresholds in all three conditions (CC,  
 146 RC, and FC) were lower than the thresholds in the RR condition in both diotic and dichotic conditions. As  
 147 the duration of preceding maskers increased, all conditions showed changes in thresholds. Thresholds in the  
 148 CC conditions showed a slight decrease as the duration of preceding maskers increased. On the contrary,  
 149 thresholds in the RC and FC conditions showed increased values with longer preceding maskers. In the FC

150 conditions, thresholds became higher than the RR conditions in both diotic and dichotic conditions.

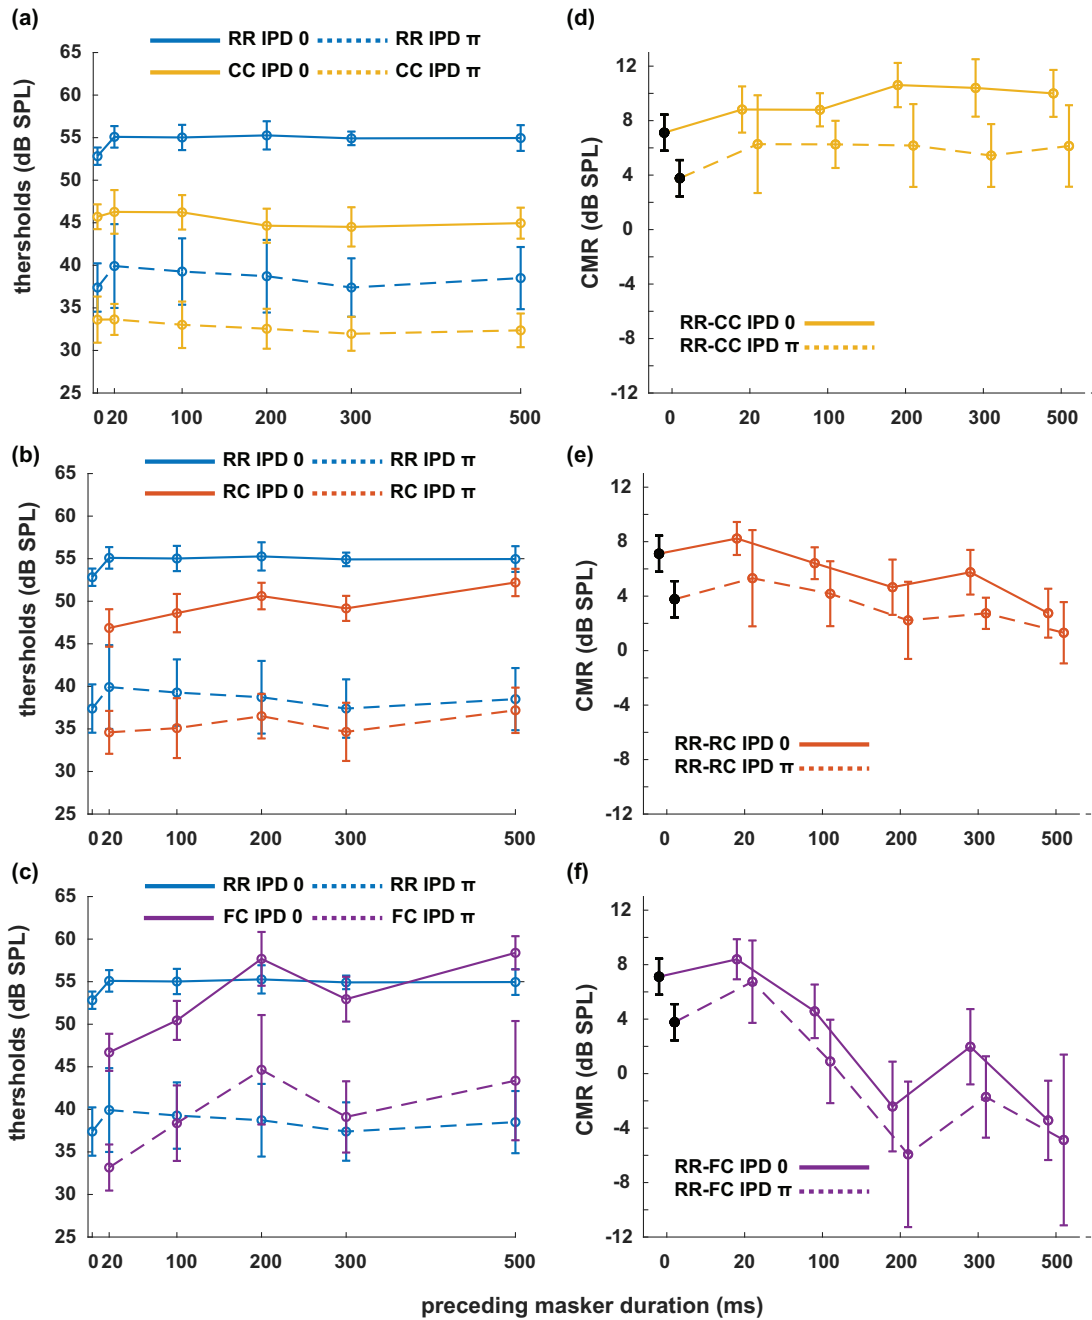

Figure 2: Mean masked thresholds (left column) and CMR values (right column) for each masker condition with the RR masker as a reference. Data from all listeners were averaged. Data are plotted for each masker type with colors (RR - blue, RC - orange, CC - yellow, FC - purple). For diotic conditions with an IPD of 0, masked thresholds are plotted with solid lines. For dichotic conditions with IPD of  $\pi$ , masked thresholds are plotted with dotted lines. Error bars indicate plus-minus one standard deviation.

### 151 3.2. Comodulation masking release

152 We calculated CMR for diotic conditions for three conditions (CC, RC, and FC) by subtracting their thresholds  
 153 from the thresholds of the RR condition. The resulting CMR is shown in Figure 2 (right panels, d-f). Each  
 154 plot shows changes in CMR with varying the duration of preceding maskers (see Table 1 for details). As a  
 155 reference, we calculated CMR for the condition with no preceding masker by subtracting the masked threshold



|          | CMR    | CC    | CC $_{\pi}$ | RC   | RC $_{\pi}$ | FC    | FC $_{\pi}$ |
|----------|--------|-------|-------------|------|-------------|-------|-------------|
|          | 0 ms   | 7.12  | 3.77        | 7.12 | 3.77        | 7.12  | 3.77        |
|          | 20 ms  | 8.82  | 6.27        | 8.23 | 5.32        | 8.39  | 6.75        |
| duration | 100 ms | 8.79  | 6.26        | 6.42 | 4.18        | 4.57  | 0.89        |
|          | 200 ms | 10.61 | 6.17        | 4.66 | 2.22        | -2.42 | -5.93       |
|          | 300 ms | 10.40 | 5.44        | 5.76 | 2.74        | 1.97  | -1.72       |
|          | 500 ms | 10.00 | 6.14        | 2.75 | 1.31        | -3.43 | -4.87       |

**Table 1: Summary of mean CMR values in all conditions. \* CMR values for no preceding masker (0 ms) were calculated by subtracting the threshold of C from that of R.**

|          | BMLD   | RR    | RC    | CC    | FC    |
|----------|--------|-------|-------|-------|-------|
|          | 0 ms   | 15.43 | 12.08 | 12.08 | 12.08 |
|          | 20 ms  | 15.18 | 12.26 | 12.63 | 13.53 |
| duration | 100 ms | 15.75 | 13.51 | 13.21 | 12.07 |
|          | 200 ms | 16.54 | 14.11 | 12.11 | 13.03 |
|          | 300 ms | 17.52 | 14.51 | 12.56 | 13.83 |
|          | 500 mx | 16.46 | 15.02 | 12.59 | 15.02 |

**Table 2: Summary of mean BMLD values in all conditions. \* BMLD values for no preceding masker (0 ms) were calculated by subtracting the threshold of C from that of R.**

of C from the that of R condition. The reference condition is plotted with black symbols. CMR in the diotic condition was estimated as 7.1 dB while CMR was 3.8 dB in the dichotic condition. When the preceding masker was short (20 ms), all conditions showed a slight increase in CMR by around 1.5 dB in diotic conditions and by 2.4 dB in dichotic conditions. With the increased length of the preceding maskers, CMR values in the CC conditions showed a slow increase while CMR values in the RC showed a slight decrease. FC conditions showed a larger decrease compared to the other conditions. In general, CMR values were lower in dichotic conditions compared to diotic conditions.

We tested the significance of the changes in CMR when the duration of the preceding masker was increased from 20 ms to 500 ms (see the table in Supplement section ??). In the CC condition with IPD of 0, CMR was not significantly changed. However, the CMR was significantly increased from 7.12 dB to 10 dB (one-way ANOVA:  $F(5,54) = 6.44, p < 0.001$ ) compared to the condition without preceding masker. In the RC condition with IPD of 0, CMR was significantly decreased from 8.23 dB to 2.75 dB (one-way ANOVA:  $F(4,45) = 16.17, p < 0.001$ ). In the FC condition with IPD of 0, CMR was significantly decreased from 8.39 dB to -3.43 dB (one-way ANOVA:  $F(4,45) = 36.47, p < 0.001$ ). For dichotic conditions with IPD of  $\pi$ , there was no significant change in CMR in the CC condition. In the RC condition, CMR was decreased 5.32 dB dB to 1.31 dB (one-way ANOVA:  $F(4,45) = 3.9, p = 0.008$ ). In the FC condition, CMR significantly decreased from 6.75 dB to -4.87 dB ( $F(4,45) = 13.57, p < 0.001$ ).

### 3.3. Binaural masking level difference

We calculated BMLD for four conditions (RR, RC, CC, and FC) by subtracting the masked threshold of dichotic conditions from those of the corresponding diotic conditions. Figure 3 shows the BMLD for each condition (RR, RC, CC, and FC). Unlike CMR, BMLD did not show a significance change (one-way ANOVA) with varying the duration of preceding maskers (RR condition ( $F(5,54)=0.64, p=0.67$ ), CC condition ( $F(5,54)=0.37, p=0.86$ ), RC condition ( $F(4,45)=1.43, p=0.24$ , and FC condition ( $F(4,45)=0.54, p=0.70$ )). For the FC condition, we observed that the variance of BMLD measures increased from 2 dB to 6.7 dB, while the variances of the other conditions were between 2 to 3.8 dB.

## 4. Discussion

In this study, we investigated the time constant of the effect of preceding masker on CMR and BMLD, and whether the effect of preceding masker is the result of high-level auditory processing at the system level. We measured CMR by varying the length of the preceding maskers. By adding short preceding maskers (20 ms), all types of preceding maskers showed increased CMR. This supports the idea of bottom-up processing where the neural encoding of CMR is assumed to be an instantaneous process with the wideband inhibition

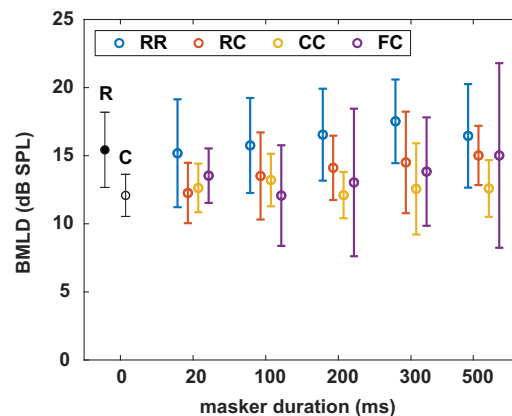

**Figure 3: Mean BMLD for each masker condition. Data from all listeners were averaged. Data are plotted for each masker type with colors (RR - blue, RC - orange, CC - yellow, FC - purple). As a reference, BMLD in the R and C conditions are shown in black.**

187 mechanism at the cochlear nucleus (CN) level [Epp and Verhey, 2009, Pressnitzer et al., 2001, Neuert et al.,  
188 2004]. In the CC condition, the effect of preceding maskers was small compared to other conditions (RC and  
189 FC). Contrary to the CC condition, in the RC and FC condition, "build-up of stream segregation" [Moore and  
190 Gockel, 2012] was more prominent as the CMR decreases with longer exposure to the preceding maskers.  
191 This indicates that the preceding modulation patterns disrupts the following comodulation cue for the target  
192 detection. This is in line with the hypothesis of the adaptation at the high-level auditory processing. However,  
193 this is at odds with the finding that BMLD was hardly affected by preceding maskers. That is, the grouping of  
194 frequencies in the preceding masker only has influence on following frequency grouping by comodulation but  
195 not by IPD. This supports the idea that low-level auditory processing is more involved in the effect of preceding  
196 maskers than high-level auditory processing.

197 In the visual system, the adaptation to light contrast occurs at the retinal level (equivalent to the  
198 cochlea), ranging from 0.1 to 17 seconds Baccus and Meister [2002]. These time constants can be realized  
199 by different retinal cells such as bipolar cells, amacrine cells, and ganglion cells [Kohn, 2007]. Similarly, in the  
200 CN, various types of neurons exist, and these neurons are connected to each other forming neural circuits  
201 such as feed-forward excitation/inhibition, feedback inhibition, and mutual excitation [Oertel et al., 2011, Manis  
202 and Campagnola, 2018, Ngodup et al., 2020]. Possible neuronal correlates of the slow adaptation effect may  
203 exist between the CN level and the cortical level (top-down influence). We speculate that the possible  
204 mechanism of the adaptation to preceding maskers may occur at a low-level of auditory processing (e.g., the  
205 CN level) rather than at a high level of auditory processing (e.g., cortical level). However, further physiological  
206 evidence is needed to support current speculation.

207 Furthermore, for the FC condition, the effect of preceding maskers was larger compared to other  
208 conditions. At the same time, CMR and BMLD values were highly variable depending on the listeners. Some  
209 listeners showed high CMR and BMLD, while others showed low CMR and BMLD. With linear regression,  
210 we conducted an additional analysis of the relationship between CMR and BMLD for the RC, CC, and FC  
211 conditions (Figure 4 - 6). The FC dichotic conditions showed a strong positive correlation between CMR and  
212 BMLD compared to other conditions. We speculate that the IPD cue facilitates target tone segregation from  
213 the noise. This may induce the grouping of FBs and the CB into one stream, thereby enhancing CMR.

214 We also observed non-linearity in combination of CMR and BMLD. In dichotic conditions, CMR  
215 measures were lower compared to diotic conditions. Interestingly, unlike the FC condition, the CC and RC  
216 conditions showed negative correlation in diotic conditions. This is in line with previous studies [Schooneveldt  
217 and Moore, 1989, Hall et al., 1990, Ernst and Verhey, 2006]. A possible neural basis has been proposed as a  
218 contralateral projection of a wideband inhibitor cell [Verhey et al., 2003, Ernst and Verhey, 2006, Ingham  
219 et al., 2006]. In addition, the CC condition did not show any changes in CMR with increased duration of the  
220 preceding masker. These may be due to the physiological limit of the auditory system in which a maximum

221 amount of masking release is reached.

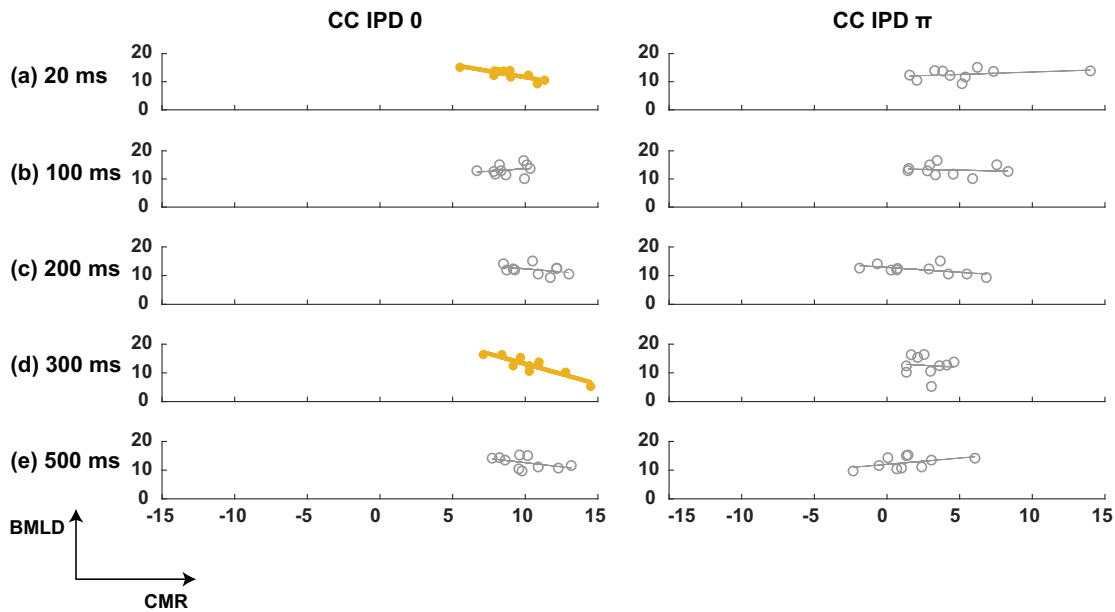

**Figure 4: Linear regression analysis between CMR and BMLD for CC conditions. Only the conditions with significant p-values were plotted with color. With 20 ms of preceding masker and 300 ms of preceding masker, CC conditions with no IPD cue showed negative correlation between CMR and BMLD (see Table 3).**

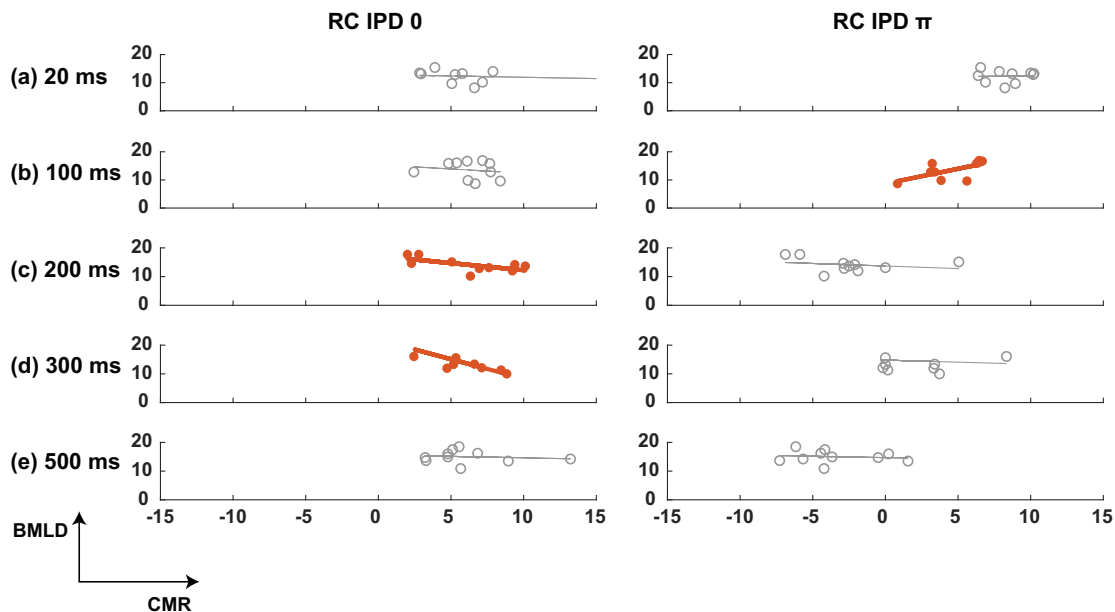

**Figure 5: Linear regression analysis between CMR and BMLD for RC conditions. Only the conditions with significant p-values were plotted with color. With 200 ms of preceding masker and 300 ms of preceding masker, RC conditions with no IPD cue showed negative correlation between CMR and BMLD. With IPD of  $\pi$ , RC condition with 100 ms of preceding masker showed positive correlation between CMR and BMLD (see Table 3).**

## 222 5. Conclusion

223 The present study investigated the effect of the preceding masker on CMR and BMLD by varying the length  
224 of the preceding masker. The effect of the preceding masker on the following sound has been suggested to



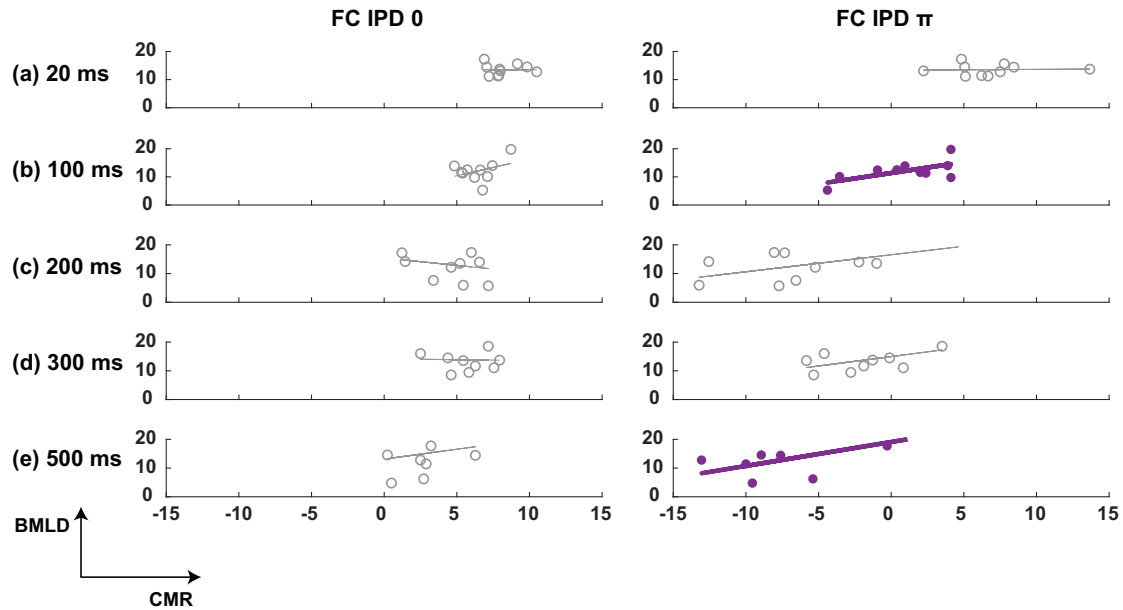

**Figure 6: Linear regression analysis between CMR and BMLD for FC conditions. Only the conditions with significant p-values were plotted with color. With IPD of  $\pi$ , RC condition with 100 ms and 500 ms of preceding masker showed positive correlation between CMR and BMLD (see Table 3).**

| $y = a * x + b$ |          |          |                  |             |          |          |                  |
|-----------------|----------|----------|------------------|-------------|----------|----------|------------------|
|                 | <i>a</i> | <i>b</i> | <i>p</i> -values |             | <i>a</i> | <i>b</i> | <i>p</i> -values |
| CC              | -0.87    | 20.34    | 0.003*           | CC $_{\pi}$ | 0.17     | 11.72    | 0.337            |
|                 | 0.37     | 9.98     | 0.518            |             | -0.10    | 13.64    | 0.727            |
|                 | -0.43    | 16.69    | 0.236            |             | -0.34    | 12.86    | 0.090            |
|                 | -1.42    | 27.28    | 0.001*           |             | -0.29    | 13.36    | 0.784            |
| RC              | -0.59    | 18.46    | 0.156            | RC $_{\pi}$ | 0.44     | 12.02    | 0.168            |
|                 | -0.09    | 12.84    | 0.678            |             | 0.01     | 12.14    | 0.978            |
|                 | -0.30    | 15.38    | 0.655            |             | 1.06     | 8.67     | 0.041*           |
|                 | -0.50    | 17.19    | 0.046*           |             | -0.18    | 13.68    | 0.492            |
| FC              | -1.35    | 21.86    | 0.003*           | FC $_{\pi}$ | -0.14    | 14.79    | 0.768            |
|                 | -0.10    | 15.64    | 0.700            |             | -0.09    | 14.69    | 0.730            |
|                 | -0.02    | 13.71    | 0.972            |             | 0.03     | 13.31    | 0.892            |
|                 | 1.18     | 4.48     | 0.286            |             | 0.77     | 11.38    | 0.045*           |
|                 | -0.51    | 15.43    | 0.594            |             | 0.59     | 16.55    | 0.076            |
|                 | -0.05    | 14.15    | 0.951            |             | 0.66     | 14.96    | 0.147            |
|                 | 0.69     | 13.13    | 0.615            |             | 0.83     | 19.08    | 0.009*           |

**Table 3: Linear regression results summary. Here, *a* indicates CMR and *b* indicates BMLD.**

225 be either the result of the adaptation at peripheral level or system level. Our hypothesis was that if CMR and  
 226 BMLD change with increased duration of the preceding masker, the effect of preceding masker could be due  
 227 to higher-level processing. From the data acquired in this study, we showed that the time constant of the effect  
 228 of preceding masker can range up to 500 ms on CMR. However, the preceding masker did not affect BMLD.  
 229 This may indicate that the effect of preceding masker may be the result of neural processing at the low-level  
 230 rather than that of higher-order processing at the system level (e.g., temporal integration).

231 **Acknowledgments**

232 We would like to thank Viktorija Ratkute for support with the data collection.

233 **6. Supplement**

**Table 4: The significant differences in CMR between conditions  $p$  – values with varying the length of the preceding masker.**

| Condition | IPD       | Duration (ms) | 0       | 20      | 100     | 200     | 300     | 500     |
|-----------|-----------|---------------|---------|---------|---------|---------|---------|---------|
| RR-CC     | IPD 0     | 0             | -       | 0.205   | 0.217   | < 0.001 | < 0.001 | 0.003   |
|           |           | 20            | -0.205  | -       | 0.999   | 0.159   | 0.274   | 0.594   |
|           |           | 100           | 0.217   | 0.999   | -       | 0.149   | 0.260   | 0.574   |
|           |           | 200           | < 0.001 | 0.159   | 0.149   | -       | 0.999   | 0.960   |
|           |           | 300           | < 0.001 | 0.274   | 0.260   | 0.999   | -       | 0.993   |
|           |           | 500           | 0.003   | 0.594   | 0.574   | 0.960   | 0.993   | -       |
|           | IPD $\pi$ | 0             | -       | 0.285   | 0.292   | 0.329   | 0.713   | 0.344   |
|           |           | 20            | 0.285   | -       | 0.999   | 0.999   | 0.979   | 0.999   |
|           |           | 100           | 0.292   | 0.999   | -       | 0.999   | 0.981   | 0.999   |
|           |           | 200           | 0.329   | 0.999   | 0.999   | -       | 0.988   | 0.999   |
|           |           | 300           | 0.713   | 0.979   | 0.981   | 0.988   | -       | 0.990   |
|           |           | 500           | 0.344   | 0.999   | 0.999   | 0.999   | 0.990   | -       |
| RR-RC     | IPD 0     | 0             | -       | -       | -       | -       | -       | -       |
|           |           | 20            | -       | -       | 0.101   | < 0.001 | 0.010   | < 0.001 |
|           |           | 100           | -       | 0.101   | -       | 0.119   | 0.887   | < 0.001 |
|           |           | 200           | -       | < 0.001 | 0.119   | -       | 0.546   | 0.076   |
|           |           | 300           | -       | 0.010   | 0.887   | 0.546   | -       | 0.001   |
|           |           | 500           | -       | < 0.001 | < 0.001 | 0.076   | 0.001   | -       |
|           | IPD $\pi$ | 0             | -       | -       | -       | -       | -       | -       |
|           |           | 20            | -       | -       | 0.855   | 0.068   | 0.177   | 0.008   |
|           |           | 100           | -       | 0.855   | -       | 0.436   | 0.716   | 0.106   |
|           |           | 200           | -       | 0.068   | 0.436   | -       | 0.991   | 0.929   |
|           |           | 300           | -       | 0.177   | 0.716   | 0.991   | -       | 0.721   |
|           |           | 500           | -       | 0.008   | 0.106   | 0.929   | 0.721   | -       |
| RR-FC     | IPD 0     | 0             | -       | -       | -       | -       | -       | -       |
|           |           | 20            | -       | -       | 0.014   | < 0.001 | < 0.001 | < 0.001 |
|           |           | 100           | -       | 0.014   | -       | < 0.001 | 0.176   | < 0.001 |
|           |           | 200           | -       | < 0.001 | < 0.001 | -       | 0.003   | 0.901   |
|           |           | 300           | -       | < 0.001 | 0.176   | 0.003   | -       | < 0.001 |
|           |           | 500           | -       | < 0.001 | < 0.001 | 0.901   | < 0.001 | -       |
|           | IPD $\pi$ | 0             | -       | -       | -       | -       | -       | -       |
|           |           | 20            | -       | -       | 0.033   | < 0.001 | < 0.001 | < 0.001 |
|           |           | 100           | -       | 0.033   | -       | 0.009   | 0.669   | 0.038   |
|           |           | 200           | -       | < 0.001 | 0.009   | -       | 0.214   | 0.982   |
|           |           | 300           | -       | < 0.001 | 0.669   | 0.214   | -       | 0.495   |
|           |           | 500           | -       | < 0.001 | 0.038   | 0.982   | 0.495   | -       |

## 234 References

- 235 S. Anstis and S. Saida. Adaptation to auditory streaming of frequency-modulated tones. *Journal of*  
236 *Experimental Psychology: Human Perception and Performance*, 11(3):257, 1985.
- 237 S. A. Baccus and M. Meister. Fast and slow contrast adaptation in retinal circuitry. *Neuron*, 36(5):909–919,  
238 2002.
- 239 A. S. Bregman. Auditory streaming is cumulative. *Journal of Experimental Psychology: Human Perception*  
240 *and Performance*, 4(3):380, 1978.
- 241 A. S. Bregman. *Auditory scene analysis: The perceptual organization of sound*. MIT press, 1994.
- 242 E. C. Cherry. Some experiments on the recognition of speech, with one and with two ears. *The Journal of the*  
243 *acoustical society of America*, 25(5):975–979, 1953.
- 244 T. Dau, S. D. Ewert, and A. J. Oxenham. Effects of concurrent and sequential streaming in comodulation  
245 masking release. In *Auditory signal processing*, pages 334–342. Springer, 2005.
- 246 B. Epp and J. L. Verhey. Superposition of masking releases. *Journal of computational neuroscience*, 26(3):  
247 393–407, 2009.
- 248 S. M. Ernst and J. L. Verhey. Role of suppression and retro-cochlear processes in comodulation masking  
249 release. *The Journal of the Acoustical Society of America*, 120(6):3843–3852, 2006.
- 250 S. D. Ewert. Afc—a modular framework for running psychoacoustic experiments and computational  
251 perception models. In *Proceedings of the international conference on acoustics AIA-DAGA*, pages  
252 1326–1329, 2013.
- 253 J. H. Grose, E. Buss, and J. W. Hall III. Within-and across-channel factors in the multiband comodulation  
254 masking release paradigm. *The Journal of the Acoustical Society of America*, 125(1):282–293, 2009.
- 255 J. W. Hall, M. P. Haggard, and M. A. Fernandes. Detection in noise by spectro-temporal pattern analysis. *The*  
256 *Journal of the Acoustical Society of America*, 76(1):50–56, 1984.
- 257 J. W. Hall, J. H. Grose, and M. P. Haggard. Effects of flanking band proximity, number, and modulation pattern  
258 on comodulation masking release. *The Journal of the Acoustical Society of America*, 87(1):269–283, 1990.
- 259 N. J. Ingham, S. Bleack, and I. M. Winter. Contralateral inhibitory and excitatory frequency response maps in  
260 the mammalian cochlear nucleus. *European Journal of Neuroscience*, 24(9):2515–2529, 2006.
- 261 L. A. Jeffress, H. C. Blodgett, T. T. Sandel, and C. L. Wood III. Masking of tonal signals. *The Journal of the*  
262 *Acoustical Society of America*, 28(3):416–426, 1956.
- 263 A. Kohn. Visual adaptation: physiology, mechanisms, and functional benefits. *Journal of neurophysiology*, 97  
264 (5):3155–3164, 2007.
- 265 L. Las, E. A. Stern, and I. Nelken. Representation of tone in fluctuating maskers in the ascending auditory  
266 system. *Journal of Neuroscience*, 25(6):1503–1513, 2005.
- 267 H. Levitt. Transformed up-down methods in psychoacoustics. *The Journal of the Acoustical society of*  
268 *America*, 49(2B):467–477, 1971.
- 269 P. B. Manis and L. Campagnola. A biophysical modelling platform of the cochlear nucleus and other auditory  
270 circuits: from channels to networks. *Hearing research*, 360:76–91, 2018.
- 271 B. C. Moore and H. E. Gockel. Properties of auditory stream formation. *Philosophical Transactions of the*  
272 *Royal Society B: Biological Sciences*, 367(1591):919–931, 2012.
- 273 I. Nelken, Y. Rotman, and O. B. Yosef. Responses of auditory-cortex neurons to structural features of natural  
274 sounds. *Nature*, 397(6715):154–157, 1999.

- 275 V. Neuert, J. L. Verhey, and I. M. Winter. Responses of dorsal cochlear nucleus neurons to signals in the  
276 presence of modulated maskers. *Journal of Neuroscience*, 24(25):5789–5797, 2004.
- 277 T. Ngodup, G. E. Romero, and L. O. Trussell. Identification of an inhibitory neuron subtype, the I-stellate cell of  
278 the cochlear nucleus. *Elife*, 9:e54350, 2020.
- 279 D. Oertel, S. Wright, X.-J. Cao, M. Ferragamo, and R. Bal. The multiple functions of t  
280 stellate/multipolar/chopper cells in the ventral cochlear nucleus. *Hearing research*, 276(1-2):61–69, 2011.
- 281 D. Pressnitzer, R. Meddis, R. Delahaye, and I. M. Winter. Physiological correlates of comodulation masking  
282 release in the mammalian ventral cochlear nucleus. *Journal of Neuroscience*, 21(16):6377–6386, 2001.
- 283 L. J. Raphael, G. J. Borden, and K. S. Harris. *Speech science primer: Physiology, acoustics, and perception*  
284 *of speech*. Lippincott Williams & Wilkins, 2007.
- 285 G. P. Schooneveldt and B. C. Moore. Comodulation masking release for various monaural and binaural  
286 combinations of the signal, on-frequency, and flanking bands. *The Journal of the Acoustical Society of*  
287 *America*, 85(1):262–272, 1989.
- 288 T. M. Shackleton, B. C. Skottun, R. H. Arnott, and A. R. Palmer. Interaural time difference discrimination  
289 thresholds for single neurons in the inferior colliculus of guinea pigs. *Journal of Neuroscience*, 23(2):  
290 716–724, 2003.
- 291 T. M. Shackleton, R. H. Arnott, and A. R. Palmer. Sensitivity to interaural correlation of single neurons in the  
292 inferior colliculus of guinea pigs. *Journal of the Association for Research in Otolaryngology*, 6(3):244–259,  
293 2005.
- 294 J. Sollini and P. Chadderton. Comodulation enhances signal detection via priming of auditory cortical circuits.  
295 *Journal of Neuroscience*, 36(49):12299–12311, 2016.
- 296 S. van de Par and A. Kohlrausch. Dependence of binaural masking level differences on center frequency,  
297 masker bandwidth, and interaural parameters. *The Journal of the Acoustical Society of America*, 106(4):  
298 1940–1947, 1999.
- 299 J. L. Verhey, D. Pressnitzer, and I. M. Winter. The psychophysics and physiology of comodulation masking  
300 release. *Experimental Brain Research*, 153(4):405–417, 2003.
- 301 O. Zohar, T. M. Shackleton, I. Nelken, A. R. Palmer, and M. Shamir. First spike latency code for interaural  
302 phase difference discrimination in the guinea pig inferior colliculus. *Journal of Neuroscience*, 31(25):  
303 9192–9204, 2011.
